# Supplementary material for: Intrinsic half-metallicity in two-dimensional Cr2TeX2 (X = I, Br, Cl) monolayers
Source: Royal Society of Chemistry journal article supplement (doi:10.1039/d3ra05780a), 2023-01-01
Supplement: d3ra05780a1.pdf [file d3ra05780a1.pdf]

## Intrinsic half-metallicity in two-dimensional $\text{Cr}_2\text{TeX}_2$ ( $X = \text{I}, \text{Br}, \text{Cl}$ ) monolayers

Jun Zhang<sup>1</sup>, Zixin He<sup>1</sup>, Chuchu Gao<sup>1</sup>, Yanyan Tao<sup>1</sup>, Feng Liang<sup>1</sup>, Guannan Li<sup>1</sup>,  
Benling Gao<sup>1\*</sup>, Guang Song<sup>1\*,2</sup>

<sup>1</sup> Department of Physics, Huaiyin Institute of Technology, 1 Meicheng East Road,  
Huai'an 223003, China\*

<sup>2</sup> Department of Physics, Nanjing University, 22 Hankou Road, Nanjing 210093,  
China

\*Corresponding author: Benling Gao

Email: [jsblgao@163.com](mailto:jsblgao@163.com)

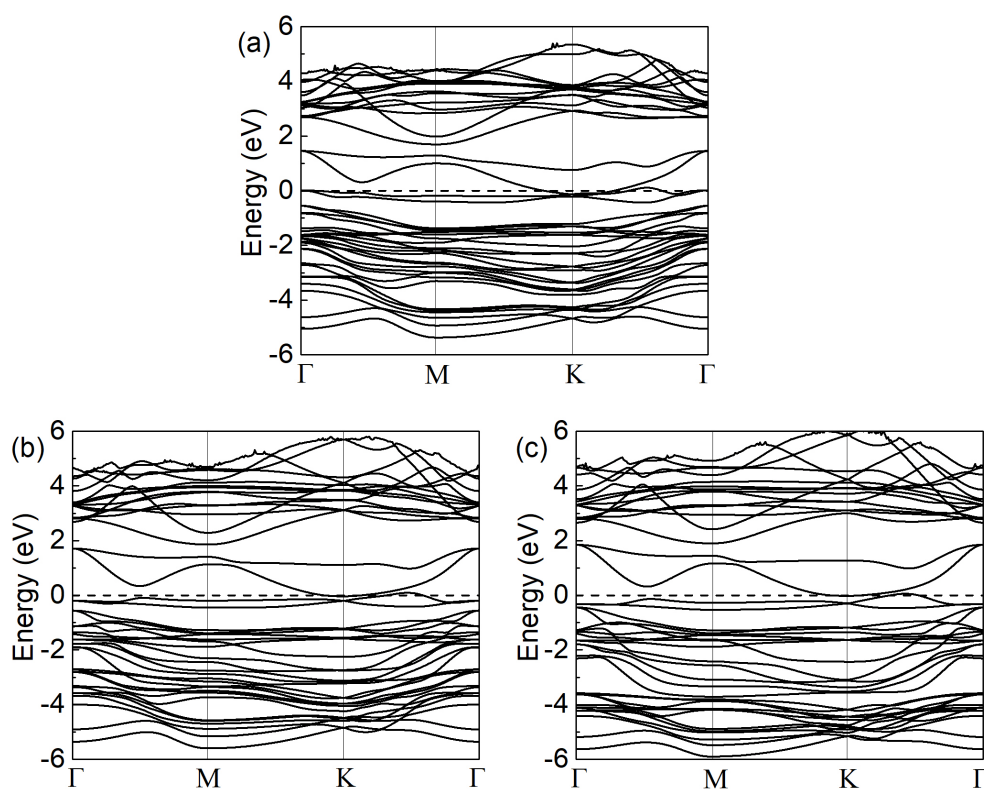

Figure S1. When the SOC is considered, the calculated band structures of  $\text{Cr}_2\text{TeX}_2$  monolayers: (a) for  $\text{Cr}_2\text{TeI}_2$ , (b) for  $\text{Cr}_2\text{TeBr}_2$ , and (c) for  $\text{Cr}_2\text{TeCl}_2$ . The dashed-black line at zero eV denotes the Fermi energy  $E_f$ . The coordinates of the high symmetry points are  $\Gamma = (0, 0, 0)$ ,  $M = (0.5, 0, 0)$ , and  $K = (1/3, 1/3, 0)$ .

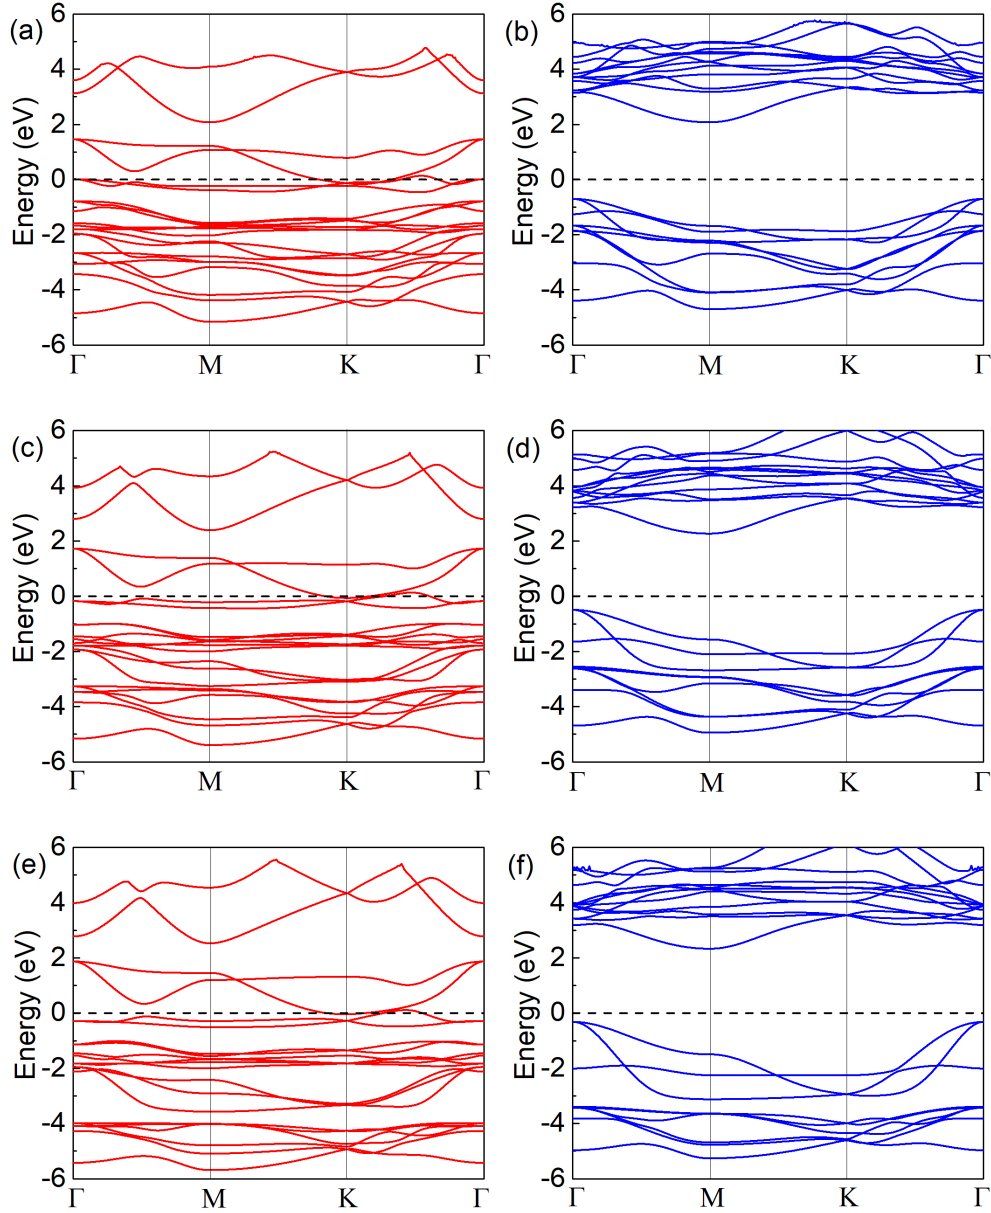

Figure S2. (Color online) When  $U_{\text{eff}} = 3.0$  eV, the calculated band structures of  $\text{Cr}_2\text{TeX}_2$  monolayers with spin-up (left: marked in red color) and spin-down (right: marked in blue color) channels: (a) and (b) for  $\text{Cr}_2\text{TeI}_2$ , (c) and (d) for  $\text{Cr}_2\text{TeBr}_2$ , (e) and (f) for  $\text{Cr}_2\text{TeCl}_2$ . The dashed-black line at zero eV denotes the Fermi energy  $E_f$ . The coordinates of the high symmetry points are  $\Gamma = (0, 0, 0)$ ,  $M = (0.5, 0, 0)$ , and  $K = (1/3, 1/3, 0)$ .

Table S1. When the spin-orbit coupling is considered, relative energies of the different magnetic configurations per  $2 \times 2 \times 1$  supercell. The energy of FM state is taken as zero.  $J_1$  and  $J_2$  represent the intra-sublayer and inter-sublayer exchange parameters, respectively.

|                                   | FM<br><i>meV</i> | AFM1<br><i>meV</i> | AFM2<br><i>meV</i> | $J_1$<br><i>meV</i> | $J_2$<br><i>meV</i> |
|-----------------------------------|------------------|--------------------|--------------------|---------------------|---------------------|
| Cr <sub>2</sub> TeI <sub>2</sub>  | 0.0              | 1916.4             | 1914.8             | 9.969               | 19.963              |
| Cr <sub>2</sub> TeBr <sub>2</sub> | 0.0              | 2428.2             | 1679.4             | 6.797               | 25.294              |
| Cr <sub>2</sub> TeCl <sub>2</sub> | 0.0              | 2454.7             | 1710.1             | 6.967               | 25.570              |

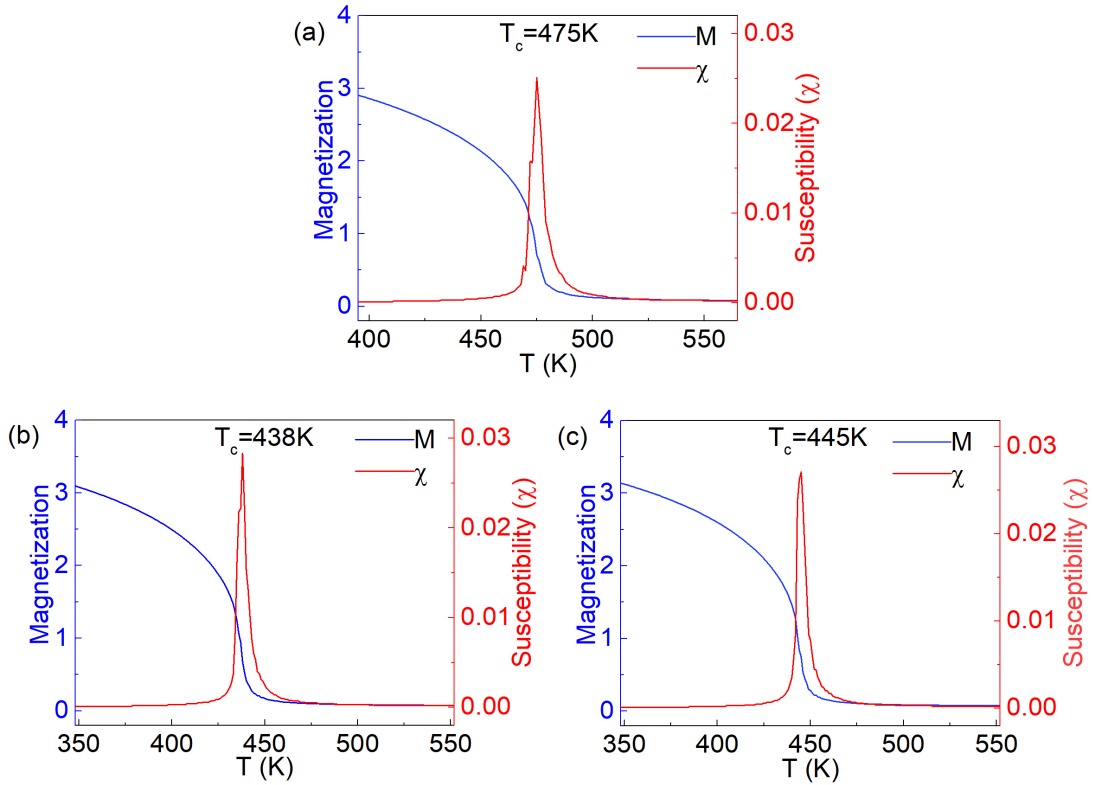

Figure S3. (Color online) When the spin-orbit coupling is considered, the average magnetic moment and susceptibility of the primitive Cr<sub>2</sub>TeX<sub>2</sub> monolayer as a function of temperature, obtained from the Monte Carlo simulations with the 2D Heisenberg model: (a) Cr<sub>2</sub>TeI<sub>2</sub>, (b) Cr<sub>2</sub>TeBr<sub>2</sub>, and (c) Cr<sub>2</sub>TeCl<sub>2</sub>. In the MC simulations, the  $D_i$  in the Hamiltonian  $H$  is taken the positive value for the Cr<sub>2</sub>TeI<sub>2</sub> monolayer, and the  $D_i$  for the Cr<sub>2</sub>TeBr<sub>2</sub> and Cr<sub>2</sub>TeCl<sub>2</sub> monolayers is taken the negative value.
